# Supplementary material for: Finding genetically-supported drug targets for Parkinson’s disease using Mendelian randomization of the druggable genome
Source: PubMed Central journal article supplement (PMC8688480; doi:10.1038/s41467-021-26280-1), 2021-12-20
Supplement: 41467_2021_26280_MOESM1_ESM.pdf [file 41467_2021_26280_MOESM1_ESM.pdf]

# Supplementary Information

## Contents

|                                    |   |
|------------------------------------|---|
| Supplementary figures .....        | 2 |
| Supplementary data dictionary..... | 3 |

## Supplementary figures

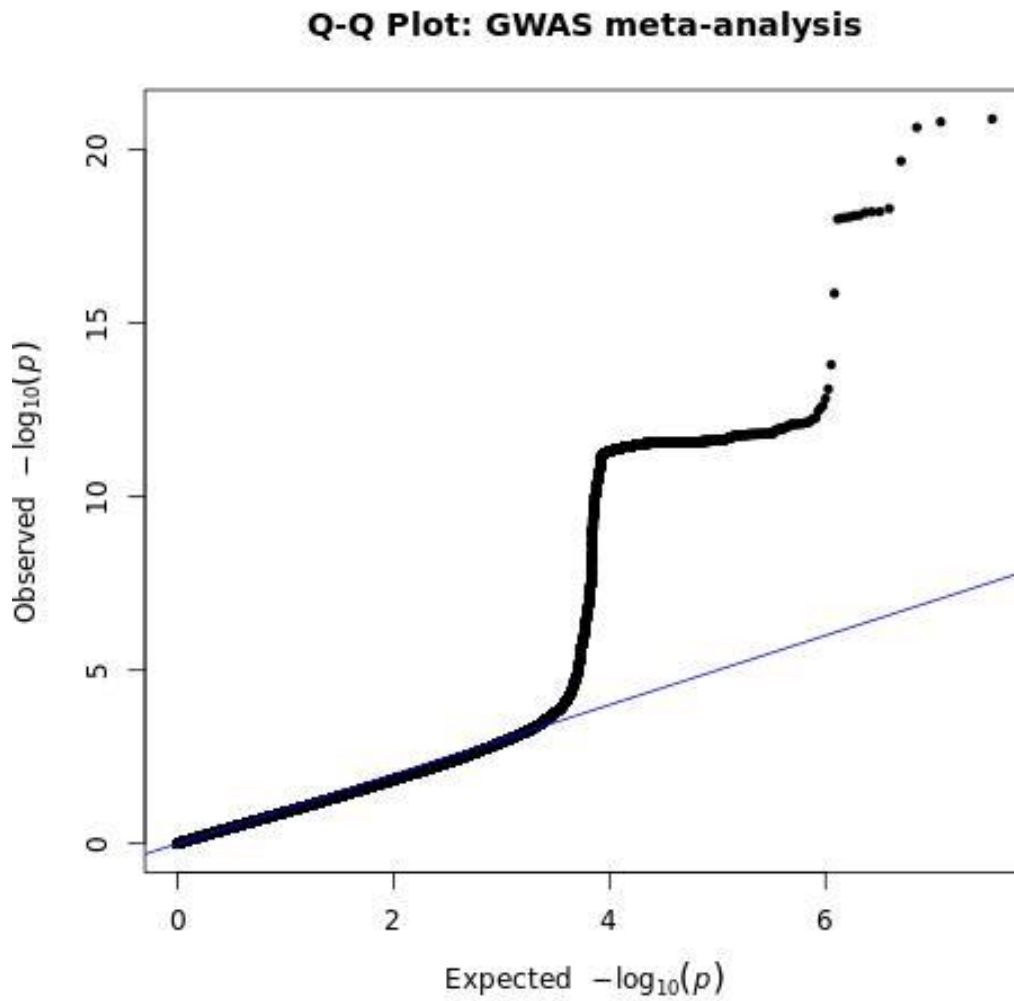

**Supplementary Fig. 1 | Quantile-quantile plot Parkinson's disease replication cohort.** Scatter plot of the observed versus expected  $-\log_{10}(p\text{-values})$  generated by the meta-analysis of case-control genome-wide association study data used for the replication step for Parkinson's disease risk.

## Supplementary data dictionary

Below are definitions and descriptions for column headings used in supplementary tables.

**beta:** MR effect size.

**beta\_lci95:** Lower boundary of 95% confidence interval of the MR effect size (beta).

**beta\_uci95:** Upper boundary of 95% confidence interval of the MR effect size (beta).

**chr\_name:** Chromosome of the gene tested.

**clump\_tresh:** Clumping threshold used

**cochrans\_q:** Cochran's Q.

**cochrans\_q\_pval:** Cochran's Q p-value.

**druggability\_tier:** Druggability tier for the gene as defined by Finan et al. 2017 (PMID: 28356508).

1 = genes encoding targets of approved and clinical-phase drugs. 2 = genes encoding proteins that are targeted by small, drug-like molecules in vivo, and genes that are highly similar to approved drug targets. 3 and 4 = genes encoding extracellular or secreted proteins, genes with some similarity to approved drug targets, and genes which belong to key druggable gene families, if not already included in tiers 1 and 2. Of these, genes in tier 3 were in within  $\pm 50$  kilobases of a GWAS SNP and encoded an extracellular protein. The remainder were put in tier 4."

**egger\_intercept:** MR-Egger intercept.

**egger\_intercept\_95\_ci:** 95% confidence intervals of the MR-Egger intercept.

**egger\_intercept\_pvalue:** P-value of the MR-Egger intercept.

**exposure:** Name of the gene tested.

**fdr\_qval:** False discovery rate-corrected p-value (also called a q-value).

**gene\_end:** Base pair position of gene end.

**gene\_start:** Base pair position of gene start.

**i2:** I<sup>2</sup> value

**method:** Method used to calculate the MR effect estimate.

**nsnp:** Number of SNPs used for the MR calculation.

**or:** Odds ratio.

**or\_lci95:** Lower boundary of 95% confidence interval of the MR effect size (odds ratio).

**or\_uci95:** Upper boundary of 95% confidence interval of the MR effect size (odds ratio).

**outcome:** Name of the outcome tested.

**p:** Raw p-value.

**p1:** Colocalization data; prior probability that a SNP in the tested region is significantly associated with expression of the tested gene.

**p12:** Colocalization data; prior probability that a SNP in the tested region is significantly associated with both expression of the tested gene and the tested PD outcome.

**p2:** Colocalization data; prior probability that a SNP in the tested region is significantly associated with expression of the tested PD outcome.

**PP.H0.abf:** Colocalization data; PPH0, posterior probability that there is no association with either trait.

**PP.H1.abf:** Colocalization data; PPH1, posterior probability that there is association with expression of the gene, but not the PD trait.

**PP.H2.abf:** Colocalization data; PPH2, posterior probability that there is association with the PD trait, but not expression of the gene.

**PP.H3.abf:** Colocalization data; PPH3, posterior probability that there is association with the PD trait and expression of the gene, with distinct causal variants.

**PP.H4.abf:** Colocalization data; PPH4, posterior probability that there is association with the PD trait and expression of the gene, with a shared causal variant.

**se:** Standard error.

**sum\_pph3\_pph4:** Colocalization data; sum of PPH3 and PPH4.  $PPH3+PPH4 < 0.8$  indicated low power for colocalization.

**tissue\_qtl\_type:** Tissue in which expression of the gene was measured (blood or brain), and the QTL type (expression of protein levels).
